# Supplementary material for: Pervasive Refusal Syndrome: Three Case Reports—Autism as a Predisposing Factor and Gentle Coercion to Shorten Duration of Disorder?
Source: Hindawi journal article supplement (doi:10.1155/2022/2258180), 2022-03-23
Supplement: f1 [file 2258180.f1.pdf]

**CARE Checklist of information to include when writing a case report**

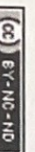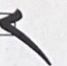

| Topic                                    | Item | Checklist item description                                                                                   | Reported on Line                                                    |
|------------------------------------------|------|--------------------------------------------------------------------------------------------------------------|---------------------------------------------------------------------|
| Key Words<br>Abstract<br>(no references) | 1    | The diagnosis or intervention of primary focus followed by the words "case report" .....                     | 30                                                                  |
|                                          | 2    | 2 to 5 key words that identify diagnoses or interventions in this case report, including "case report" ..... | 16, 20-2                                                            |
|                                          | 3a   | Introduction: What is unique about this case and what does it add to the scientific literature? .....        | 18-24                                                               |
| Introduction                             | 3b   | Main symptoms and/or important clinical findings .....                                                       | 12, 20-1, 23-4                                                      |
|                                          | 3c   | The main diagnoses, therapeutic interventions, and outcomes .....                                            | 25-28                                                               |
|                                          | 3d   | Conclusion—What is the main "take-away" lesson(s) from this case? .....                                      | 85-87                                                               |
| Patient Information                      | 4    | One or two paragraphs summarizing why this case is unique ( <b>may include references</b> ) .....            | 102-48, 167-213, 229-302                                            |
|                                          | 5a   | De-identified patient specific information .....                                                             | 102-04, 167-8, 229-32                                               |
|                                          | 5b   | Primary concerns and symptoms of the patient .....                                                           | 103-8, 169-72, 238-41                                               |
| Clinical Findings                        | 5c   | Medical, family, and psycho-social history including relevant genetic information .....                      | 127-130, 232-3                                                      |
|                                          | 5d   | Relevant past interventions with outcomes .....                                                              | 113-4, 181, 247-51, table 2                                         |
|                                          | 6    | Describe significant physical examination (PE) and important clinical findings .....                         | table 5, line 425                                                   |
| Timeline                                 | 7    | Historical and current information from this episode of care organized as a timeline .....                   | 116, 181, 833                                                       |
|                                          | 8a   | Diagnostic testing (such as PE, laboratory testing, imaging, surveys) .....                                  | n.a.                                                                |
|                                          | 8b   | Diagnostic challenges (such as access to testing, financial, or cultural) .....                              | 103, 118, 247                                                       |
| Therapeutic Intervention                 | 8c   | Diagnosis (including other diagnoses considered) .....                                                       | n.a.                                                                |
|                                          | 8d   | Prognosis (such as staging in oncology) where applicable .....                                               | 96, table 3                                                         |
|                                          | 9a   | Types of therapeutic intervention (such as pharmacologic, surgical, preventive, self-care) .....             | 129-131, 191, 254-5                                                 |
| Follow-up and Outcomes                   | 9b   | Administration of therapeutic intervention (such as dosage, strength, duration) .....                        | 208                                                                 |
|                                          | 9c   | Changes in therapeutic intervention (with rationale) .....                                                   | line 99, table 4                                                    |
|                                          | 10a  | Clinician and patient-assessed outcomes (if available) .....                                                 | n.a.                                                                |
| Discussion                               | 10b  | Important follow-up diagnostic and other test results .....                                                  | 266-98                                                              |
|                                          | 10c  | Intervention adherence and tolerability (How was this assessed?) .....                                       | 204                                                                 |
|                                          | 10d  | Adverse and unanticipated events .....                                                                       | 433-442                                                             |
| Patient Perspective                      | 11a  | A scientific discussion of the strengths AND limitations associated with this case report .....              | 319-423, 462-514                                                    |
|                                          | 11b  | Discussion of the relevant medical literature <b>with references</b> .....                                   | 319-423                                                             |
|                                          | 11c  | The scientific rationale for any conclusions (including assessment of possible causes) .....                 | 444-9                                                               |
| Informed Consent                         | 11d  | The primary "take-away" lessons of this case report (without references) in a one paragraph conclusion ..... | 150-164, 215-27, 303-14                                             |
|                                          | 12   | The patient should share their perspective in one to two paragraphs on the treatment(s) they received .....  | Yes <input checked="" type="checkbox"/> No <input type="checkbox"/> |
|                                          | 13   | Did the patient give informed consent? Please provide if requested .....                                     |                                                                     |
